1 **Full title:** *Experiences of Parents and Solid Organ-transplanted Adolescents: A Qualitative*  
2 *Framework Analysis through Focus Groups. The TransplantKIDS Mental Health Project*

3 **Short title:** *Focus Groups in Parents and Organ-transplanted Adolescents*

4

5

6 **Jessica Garrido-Bolton<sup>1,2</sup>, Rocío de la Vega<sup>3,4</sup>, María Fe Bravo-Ortiz<sup>1,2,5,6</sup>**

7

&

8

**Eduardo Fernández-Jiménez<sup>1,2,7,\*</sup>**

9

10 <sup>1</sup> *Department of Psychiatry, Clinical Psychology and Mental Health, La Paz University*  
11 *Hospital, Madrid, Spain*

12 <sup>2</sup> *Hospital La Paz Institute for Health Research (IdiPAZ), Madrid, Spain*

13 <sup>3</sup> *Department of Personality, Evaluation and Psychological Treatment, University of Málaga,*  
14 *Málaga, Spain*

15 <sup>4</sup> *Instituto Biomédico de Málaga – IBIMA Plataforma Bionand, Málaga, Spain*

16 <sup>5</sup> *Department of Psychiatry, Universidad Autónoma de Madrid (UAM), Madrid, Spain*

17 <sup>6</sup> *Centro de Investigación Biomédica en Red de Salud Mental (CIBERSAM), Instituto de Salud*  
18 *Carlos III, Madrid, Spain*

19 <sup>7</sup> *Faculty of Social Sciences and Communication, Universidad Europea de Madrid, Madrid,*  
20 *Spain*

21

22 **\* Corresponding author:** *Dr Eduardo Fernández-Jiménez, [e.fernandez.jimenez@facultyue.es](mailto:e.fernandez.jimenez@facultyue.es)*

23

24

25

NOTE: This preprint reports new research that has not been certified by peer review and should not be used to guide clinical practice.

26 **Abstract**

27 **Background**

28 Solid organ transplantation is the optimal treatment for children and adolescents with end-stage  
29 organ failure. However, the biopsychosocial challenges faced jointly by the various types of  
30 solid organ recipients have received little attention from a multidimensional and qualitative  
31 approach in paediatric populations. This is the first study based on focus groups to identify the  
32 unmet care needs perceived by transplanted adolescents and parents throughout the pre-, peri-  
33 , and post-surgical phases of various types of solid organ transplantation.

34 **Methods**

35 Two focus groups were conducted with five adolescent transplant recipients and five parents,  
36 respectively, at the Children's Hospital of La Paz University Hospital in Spain. The focus  
37 groups followed a biopsychosocial theoretical framework and used a semi-structured  
38 moderating guide. Participants were asked open-ended questions about aspects of healthcare  
39 that they would have liked to change or improve, followed by specific questions about  
40 biomedical, psychological, and social aspects that were not spontaneously addressed. The  
41 sessions were conducted using a video call, audio-recorded, and automatically transcribed.  
42 Thematic framework analysis was used to examine the data, involving familiarisation,  
43 identifying a thematic framework, indexing, charting, mapping, and interpreting.

44 **Results**

45 The findings revealed several unmet care needs, highlighting the importance of addressing  
46 social and psychological aspects of care throughout the transplantation process. Key issues  
47 common to both informant groups were inconveniences regarding the distance to the hospital  
48 and long waiting times for outpatient hospital visits, as well as the importance of peer support,  
49 humanised interaction with healthcare personnel, and mental health care during the whole  
50 process.

51 **Conclusions**

52 These findings will inform the design of future multifaceted prehabilitation interventions to  
53 prepare patients and parents for solid organ transplantation. This study highlights the  
54 importance of understanding the experiences and unmet needs of adolescent transplant  
55 recipients and their families in order to improve healthcare delivery and clinical outcomes.

56

57

58 **Keywords:** solid organ transplantation; transplanted adolescents and parents; unmet care  
59 needs; biopsychosocial model; focus groups; thematic framework analysis

## 60 **Introduction**

61 Solid organ transplantation is the best treatment option for most children and  
62 adolescents with end-stage organ failure [1]. Despite advancements in allograft survival rates  
63 in paediatric populations following solid organ transplant, to date, understanding the challenges  
64 faced by survivors, such as the impact on biopsychosocial outcomes, has received little  
65 attention [2].

66 By definition, children with end-stage organ failure experience life-threatening  
67 illnesses and potentially traumatising circumstances, such as major surgeries, admission to the  
68 intensive care unit (ICU), coping with various side effects, attending regular hospital  
69 appointments, and undergoing multiple invasive testing. In addition, they experience restricted  
70 social interactions with family and friends as well as missing school and other typical normative  
71 childhood activities. Consequently, all these factors inevitably affect the quality of life of  
72 patients undergoing solid organ transplantation and their families [3].

73 Mental Health Consultation-Liaison teams play key roles in these clinical populations,  
74 such as assessing the suitability of living donor candidates; evaluating the recipient's  
75 understanding of the transplant process; assessing patients' mental state, functioning, and  
76 quality of life; treating potential psychopathological comorbidities; and delivering  
77 psychological interventions to patients and/or their relatives [4]. However, although  
78 quantitative research has contributed to these advances in the clinical assessment and treatment  
79 of organ transplant recipients, qualitative investigation is still scarce or is limited exclusively  
80 to some type of organ in paediatric populations. In this sense, this study aimed to collect and  
81 jointly analyse the subjective experiences of adolescent recipients and parents during the entire  
82 process of various types of solid organ transplantation.

83 The Children's Hospital of La Paz University Hospital (Madrid) offers reference  
84 healthcare to paediatric patients throughout Spain. In particular, La Paz is the only centre in

85 Spain that performs all types of paediatric transplants, and is a national reference centre for  
86 other complex pathologies. According to data from the National Transplant Organization  
87 (ONT, acronym in Spanish) in its annual report, La Paz is the Spanish centre that performed  
88 the highest number of paediatric transplants in Spain in 2022, making it a suitable context for  
89 collecting clinically relevant data in these paediatric populations [5].

90 To the best of our knowledge, this study is the first to qualitatively identify unmet care  
91 needs, utilising focus groups, of paediatric patients and parents throughout the pre-, peri-, and  
92 post-surgical phases of diverse solid organ transplants. This qualitative approach contributes  
93 to the humanisation of scientific and care activities as it incorporates and integrates the  
94 perspectives, preferences, values, and expectations of the recipients of the care process. In this  
95 sense, this study follows a family-centred care model [6] and promotes a comprehensive and  
96 holistic care process in which patients and their parents are represented, thereby humanising  
97 health care by obtaining clinical demands directly from primary stakeholders.

98 We expect that these findings will provide essential novel information for the design of  
99 future prehabilitation interventions for paediatric transplants (i.e. to prepare the patient to be in  
100 the best possible state before surgery).

101

## 102 **Materials and Methods**

### 103 ***Study Design***

104 The focus group method was selected because of its group dynamics, which can  
105 generate rich data, particularly in situations where prior knowledge is limited [7]. Focus groups  
106 and semi-structured interviews are widely recognised as the primary methods used in  
107 qualitative research [8]. Non-quantitative methods have been increasingly used by paediatric  
108 psychologists and other researchers to improve the understanding of the scientific community  
109 and provide new perspectives in healthcare [9]. These methods examine how children and their

110 families experience and respond to health-related challenges, allowing researchers to better  
111 understand the phenomenon under study [10].

112 To ensure the accuracy and transparency of the reporting of this qualitative study, we  
113 closely followed the COnsolidated criteria for REporting Qualitative research (COREQ). This  
114 involved a 32-item checklist developed specifically for reporting research related to interviews  
115 and focus groups [8].

116

### 117 ***Sample***

118 Focus group participants were recruited by the Mental Health Consultation-Liaison  
119 team of the Children's Hospital of La Paz University Hospital (Madrid, Spain), which  
120 approached eligible candidates. Suitable candidates for the patient group were adolescents  
121 between the ages of 12-18 who had already undergone solid organ transplantation and were  
122 able to speak Spanish fluently. To enrich the content of the focus group and ensure greater  
123 diversity of experiences, participants who had undergone transplantation of different solid  
124 organs were selected deliberately. The patient group consisted of adolescents aged between 13  
125 and 18 years (mean = 15.6;  $SD = 1.95$  years) who had undergone transplantation, on average,  
126 13.4 months ago ( $SD = 6.54$ ; range: 6–24 months).

127 As in the adolescent group, parents of children who had received different solid organ  
128 transplants were prioritised in the parents' group. The parents chosen were not the parents of  
129 the adolescents in the focus group to broaden the spectrum of experiences and perspectives.  
130 However, an exception was made for one adolescent who received a lung transplant due to the  
131 much smaller sample size of this type of transplant, thus allowing for the joint participation of  
132 the mother and child. The second group consisted of parents of patients aged between 8 and 15  
133 years (mean = 11.6;  $SD = 3.05$  years) who had undergone transplantation, on average, 14.6  
134 months ago ( $SD = 5.46$ ; range: 10 to 24 months).

135 In the adolescent group, we included more than one participant who had received a  
136 kidney transplant, and in the parent group, we included more than one parent of a heart  
137 transplant recipient, as we considered these types of transplants to be the most representative.  
138 The characteristics of the participants are listed in Table 1.

139

140 **Table 1.** Characteristics of study participants ( $n = 10$ ).

| <b>Participants:</b>    |            |                                    |
|-------------------------|------------|------------------------------------|
| <b>Adolescent Group</b> | <b>Sex</b> | <b>Type of transplant received</b> |
| Adolescent 1            | Female     | Kidney (deceased donor)            |
| Adolescent 2            | Female     | Heart                              |
| Adolescent 3            | Female     | Kidney (deceased donor)            |
| Adolescent 4            | Male       | Lung                               |
| Adolescent 5            | Male       | Liver                              |

  

| <b>Participants: Parent Group</b> |            |                                                |
|-----------------------------------|------------|------------------------------------------------|
|                                   | <b>Sex</b> | <b>Type of transplant their child received</b> |
| Parent 1                          | Male       | Heart                                          |
| Parent 2                          | Female     | Heart                                          |
| Parent 3                          | Female     | Kidney (living donor)                          |
| Parent 4                          | Male       | Hepato-renal                                   |
| Parent 5                          | Female     | Lung                                           |

141

## 142 ***Procedure***

143 The parents of each enlisted participant (or, when applicable, patients of legal age) were  
144 contacted by telephone by one of the team researchers to ensure that the participant met the  
145 criteria and to explain how the group would be conducted. All the contacted participants wished  
146 to participate in the study. Parents of patients (or, when applicable, patients of legal age) who  
147 provided written informed consent were scheduled to participate in this study. One person did

148 not show up to the adolescent group and was contacted later for an individual in-depth  
149 interview following the same format and conditions.

150 The patients' parents were asked to authorise, in an informed manner, the participation  
151 of their children and themselves (when required) in focus group sessions to qualitatively  
152 identify unmet care needs during the pre-, peri-, and post-transplant phases. Two group sessions  
153 were conducted (one session per participant type: patients and parents), lasting approximately  
154 90 min each, arriving at data saturation (meaning that no new value information was obtained).  
155 The groups comprised five participants each ( $n = 10$  in total).

156 The interview guide used in both focus groups followed a biopsychosocial theoretical  
157 framework. Specifically, each focus group began indicating group norms  
158 (confidentiality/privacy, not interrupting others' turn to speak, and not judging others'  
159 comments). Afterwards, the session continued with a first part of open questions about what  
160 aspects participants would have changed or improved in health care, both for the patients and  
161 parents, during the entire transplantation process. Subsequently, the second part of the focus  
162 group posed specific questions about the biomedical, psychological, and social aspects that  
163 would have improved throughout the transplantation process and were not spontaneously  
164 addressed in the first part of each focus group. The facilitator followed a semi-structured  
165 moderating guide, and the questions posed are listed in Table 2.

166

167 **Table 2.** Focus group topics and key questions.

| <b>Adolescent Focus Group</b>          |                                                                                                                                                                                                                                                                                                    |
|----------------------------------------|----------------------------------------------------------------------------------------------------------------------------------------------------------------------------------------------------------------------------------------------------------------------------------------------------|
| <b>Free open-ended questions phase</b> | - What aspects would you improve during your visits to the hospital or during your admission to the hospital for the organ transplant you received?<br><br>- Have you missed any kind of support or specific help related to the transplant from any kind of professional working at the hospital? |



---

**Directed open-ended questions phase\*** - In terms of the care you have been given by the **doctors and nurses**, what (other) aspects would you improve during your visits to the hospital or during your admission to the hospital for the organ transplant you received?

- In terms of **psychological and emotional issues**, what (other) aspects would you improve during your hospital visits or during your admission to the hospital for the organ transplant you received?

- In terms of **social support**, what (other) aspects would you improve during your visits to the hospital or during your admission to the hospital for the organ transplant you received?

---

**Parent Focus Group**

**Free open-ended questions phase** - What aspects of your child's health care during the organ transplantation process that he/she has undergone, either during the follow-up in outpatient appointments or during hospitalisation, would you improve?

- What kind of interventions or clinical care have you missed during this process for your child?

- What kind of interventions or clinical care have you missed during this whole process for you?

- What aspects of health care would you improve for you as a parent of a child who has undergone an organ transplant?

---

**Directed open-ended questions phase\*** - On a **medical level**, what (other) aspects would you improve in the care of your child and you as parents during the solid organ transplantation process?

-On a **mental health level**, what (other) aspects of care for your child and for you as parents during the solid organ transplantation process would you improve?

-On a **social level**, what (other) aspects of the care for your child and for you as parents during the solid organ transplantation process would you improve?

---

168 *\*Directed questions were asked only when participants did not spontaneously address specific aspects of one of*  
169 *the three areas of the biopsychosocial model.*

170

171 The sessions were conducted by videocall, audio-recorded, and automatically  
172 transcribed, respecting the confidentiality of the information at all times. The sessions were

173 facilitated by a member of the research team and not by the PI of this project (EFJ) to avoid  
174 bias (the PI knows most of the patients and parents). The facilitator was a female psychologist  
175 with a Master's degree. However, the facilitator was introduced as a researcher and not as a  
176 psychologist, so as not to bias participants in prioritising mental health aspects to the detriment  
177 of biomedical and social domains. In addition, this facilitator worked mainly on another PI's  
178 scientific project, focused on a different paediatric clinical population, and did not have any  
179 relationship with the participants prior to study commencement, nor did they know of her  
180 previously. Furthermore, this facilitator did not participate in any of the subsequent stages of  
181 this project: transcription generation, data analysis, data interpretation, writing or reviewing  
182 this paper.

183 Subsequently, the automatically generated transcriptions were reviewed to (1) change  
184 the name of the participants using a code and (2) correct any transcription mistakes. The  
185 recordings were maintained until it was verified that the transcription process had been  
186 performed correctly. The transcripts were not returned to participants for their comments.  
187 When needed, in anticipation that more relevant information would be collected, participants  
188 were offered the possibility of conducting individual in-depth interviews after the focus group.  
189 Interviews were conducted using the same standards mentioned above.

190  
191 The study protocol was registered at [clinicaltrials.gov](https://clinicaltrials.gov) on 1 July 2022 (NCT05441436) [11].  
192 Recruitment for this study began on October 21, 2022 and ended on February 8, 2024.

### 193 194 ***Ethical Considerations***

195 This study was conducted in accordance with the principles established in the Helsinki  
196 declaration, strictly respecting confidentiality and the requirements of Spanish (14/2007, 3 July  
197 2007 on Biomedical Research; and Organic Law 3/2018, 5 December 2018) and European data

198 protection regulations. This study was approved by the Research Ethics Committee of La Paz  
199 University Hospital (Madrid, Spain) (institutional code: PI-5223). Parents or legal guardians  
200 of patients (or, when applicable, patients of legal age) provided their written informed consent,  
201 for minor patients and for themselves, to participate in this study.

202

### 203 ***Data Analysis***

204 Two coders (JGB and EFJ) independently analysed the data following the steps of the  
205 “qualitative framework analysis” [8]. The first step was familiarisation, which involved reading  
206 all the transcripts thoroughly, listening to the tapes, and listing key ideas/recurrent themes to  
207 identify a thematic framework (immersion in data). A coding frame was developed based on  
208 these key themes. This involved entering brief summaries into the coding frame, along with  
209 the page numbers of the original data excerpts, facilitating easy retrieval for further analysis.

210 Subsequently, a biopsychosocial model was systematically applied to all the data  
211 (indexing), and the data were rearranged according to the relevant sections of the thematic  
212 framework (charting). Charting was performed using columns (participants) and rows  
213 (themes). The coders had a meeting with a third researcher with experience in framework  
214 analysis (RV) to resolve any coding disagreements. Finally, concepts were defined, and data  
215 were interpreted by comparing and contrasting respondents' accounts and searching for  
216 explanations of patterns observed in the data (mapping and interpretation) [9].

217

### 218 **Results**

219 In this section, we present participants' experiences regarding solid organ  
220 transplantation and biopsychological factors resulting from the analysis of the transcripts.  
221 Table 3 presents an overview of the topics that emerged during the focus group sessions.

222

223

**Table 3.** Key issues addressed by each focus group: adolescents and parents.

| ADOLESCENT FOCUS GROUP                     |                                                |                                         |
|--------------------------------------------|------------------------------------------------|-----------------------------------------|
| <b>Biomedical Factors</b>                  | Perception of long hospital admission          |                                         |
|                                            | Impact of clinical diagnosis                   |                                         |
|                                            | Access to medication                           |                                         |
|                                            | Symptoms                                       |                                         |
| <b>Psychological and Emotional Factors</b> | Anxiety                                        |                                         |
|                                            | Mental health care                             |                                         |
| <b>Social Factors</b>                      | Distance to the hospital                       |                                         |
|                                            | Hospital Staff                                 | Satisfaction with humanised interaction |
|                                            |                                                | Dissatisfaction with interaction        |
|                                            | Hospitalisation ward                           |                                         |
|                                            | Outpatient care                                | Waiting times                           |
|                                            | Limited social interactions                    |                                         |
|                                            | Academic challenges                            |                                         |
|                                            | PARENT FOCUS GROUP                             |                                         |
| <b>Biomedical Factors</b>                  | Medical care/attention                         | Satisfaction with clinical care         |
|                                            |                                                | Excessive clinical care                 |
|                                            |                                                | Experience being a donor                |
| <b>Psychological and Emotional Factors</b> | Attitudes, beliefs and expectations            |                                         |
|                                            | Wishes and desires                             |                                         |
|                                            | Mental health care                             | For the child                           |
|                                            |                                                | For other family members                |
| <b>Social Factors</b>                      | Distance to the hospital                       |                                         |
|                                            | Need of creating a peer/family support network |                                         |

Caregiver leave at the workplace

---

Outpatient care

Waiting times

---

Balancing/conciliating hospital visits with

work and family responsibilities

---

Bureaucratic challenges

---

Laws, social aids, and the information

received regarding them

---

Advocacy for transplanted children to be

recognised as a collective

224

225

226

### Adolescent Focus Group

#### 227 Biomedical Factors

228 **Perception of long hospital admission.** Most patients felt that their hospital stay was  
229 excessively prolonged. One individual mentioned that it became particularly burdensome once  
230 she experienced clinical improvement.

231 *“I felt it was overwhelming to be hospitalized for a very long time”.*

232 *“When I started to get better, I got tired of being there [hospital ward] because I was*  
233 *there for a long time”.*

234

235 **Impact of clinical diagnosis.** One adolescent requiring a kidney transplant, described  
236 the impact of suddenly and unexpectedly receiving the diagnosis of a chronic renal condition.

237 *“Before the transplant, I was diagnosed with renal failure from one day to the next, and*  
238 *I had no symptoms or anything... So, I was very shocked by that.”*

239

240 **Access to medication.** Certain individuals mentioned that access to medication could  
241 be problematic, as it was intermittently unavailable at local pharmacies.

242           *“Sometimes health professionals had trouble getting me certain medications because*  
243 *they were either out of stock or temporarily discontinued”.*

244

245           **Symptoms.** The most common symptoms were fatigue, sickness, and concentration  
246 difficulties.

247           *“I felt very weak and tired at the hospital and at home, I didn't want to get out of bed...*  
248 *I felt a lot of stress”.*

249           *“My immune system was very low and it made it [studying] more difficult (...). I could*  
250 *not concentrate, grasp the information well, understand what the teachers were saying...”.*

251

## 252 Psychological and Emotional Factors

253           **Anxiety.** Most participants reported feeling anxious as their predominant emotional  
254 state. One adolescent who became a kidney recipient, reported frequent panic attacks following  
255 renal graft rejection.

256           *“To be honest, I experienced a lot of anxiety after the transplant, especially at the*  
257 *hospital”.*

258           *“I wish the transplant had gone better... I had a lot of panic attacks in the ICU because*  
259 *of my rejection.”*

260

261           **Mental health care.** Adolescents rated contact with a mental health professional  
262 (clinical psychologist/psychiatrist) as a positive intervention. One adolescent who received a  
263 lung transplant, noted that he benefited from psychological assistance to cope with medical  
264 tests that caused him anticipatory anxiety.

265 *“I value psychologists the most. Before my transplant, I was anxious and stressed. The*  
266 *psychologists helped calm my nerves during that time, because just thinking about the*  
267 *transplant procedure made me anxious.”*

268 Another adolescent who underwent a liver transplant, commented: *“The psychologists*  
269 *had to intervene because I was clearly reluctant to undergo the lumbar puncture”.*

270

## 271 Social Factors

272 **Distance to the hospital.** Adolescents who had to travel between cities for medical  
273 attention reported some inconveniences, such as transportation and being far from their loved  
274 ones.

275 *“Transport to medical appointments, that's the only problem (...) the type of vehicle*  
276 *[ambulance] was uncomfortable ...”.*

277 *“Personally, I strongly would have preferred being in my homeland [region of Spain],*  
278 *I missed having friends visit [during hospital admission] because I was in Madrid.”*

279

280 **Hospital Staff. Satisfaction with humanised interaction.** Overall, there was  
281 widespread satisfaction with the interpersonal care provided by the hospital staff among the  
282 participants, which significantly eased their hospital visits and admissions.

283 *“All the efforts made by the nurses, doctors, and orderlies to create a positive*  
284 *experience for us despite the challenges (...). Their efforts ultimately gave me hope for life after*  
285 *the transplant and, at the same time, made my time there a little brighter.”*

286 Only one adolescent held a more critical view of this matter.

287 *“I think I would improve the interaction from the nurses or assistants (...). Sometimes,*  
288 *they would come in with a bit of a bad mood or something like that. That's the only thing I*  
289 *would change.”*

290           **Hospitalisation ward.** One adolescent who was a kidney recipient, expressed  
291   discontent with the formal aspects of the hospitalisation ward, particularly the distribution of  
292   patients in the rooms.

293           *“In other surgeries, such as the catheter dialysis (...) I was in a shared room with a*  
294   *two-month-old baby. Therefore, the truth is that I had a very, very bad time (...). I told my*  
295   *doctors “I want to leave now because I cannot stay here any longer”. Because imagine, a two-*  
296   *month-old baby girl who would not stop crying all night long.”*

297

298           **Outpatient care.** Adolescents expressed complaints about their waiting times.

299           *“I had to wait for two or three hours for some appointments (...). When I had to go*  
300   *there every three months, I was like – I do not want to go because I am going to be there for*  
301   *hours....”*

302

303           **Limited social interaction.** All the adolescents agreed that this was one of the biggest  
304   challenges.

305           *“When I was on dialysis, I had very limited freedom. Travelling, for instance, was quite*  
306   *challenging because of the machine and logistical issues involved. It restricted me during a*  
307   *time when my friends were enjoying more independence and going out at 16-17 years old. This*  
308   *was particularly tough for me.”*

309

310           **Academic Challenges.** All adolescents, particularly those in their final years of high  
311   school, expressed the negative impact of transplant on their academic performance.

312           *“Truth be told, I had a really tough time because I missed a lot more school than usual*  
313   *(four and a half months), and I was really stressed out because I was at risk of repeating a*  
314   *year, which isn't ideal during high school...”*



315           *"When you return to high school after a transplant, it can be in the middle of the*  
316 *academic year... it can be disorienting because your classmates are further ahead than you".*

317 Many expressed frustration and despair over losing valuable school time due to the long waiting  
318 hours for outpatient hospital appointments.

319           *"The truth is that I was in my first year of high school and waiting two or three hours*  
320 *for medical check-ups wasted a lot of my time".*

321 One adolescent expressed dissatisfaction with the lack of curricular adaptation.

322           *"When I arrived, I had missed most of the first term, and unfortunately, the teachers*  
323 *didn't offer much assistance. They immediately gave me exams without allowing me time to*  
324 *catch up, which caused me to struggle. Now, I find it challenging to keep up with the others."*

325 Finally, some adolescents expressed limitations in receiving educational support either  
326 at home or at the hospital, indicating that their assistance was insufficient. One adolescent, who  
327 was entitled to the Home Education Support Service, reported not having benefited from this  
328 service at all.

329           *"They told me that since I was in my final school year I could request home education*  
330 *for when I had to stay home in isolation, to help me keep up and not fall behind. However, the*  
331 *teacher never showed up (...). It really frustrated me, as it has been very noticeable, especially*  
332 *in mathematics which is a subject where a lot of progress is made".*

333           *"When I was in the hospital, there were two teachers who came to help (...), but I could*  
334 *see that they didn't have enough time because there were too many children, too many*  
335 *people..."*.

336

337

338

339

340 **Parent Focus Group**

341 Biomedical Factors

342 **Medical care/attention.** Overall, most parents expressed a high level of satisfaction  
343 and gratitude for their children’s medical follow-up and care throughout the transplantation  
344 process.

345 *“We are very happy and grateful with the medical attention our child received. The*  
346 *truth is that the doctors were always excellent.”*

347 *“It seemed very human to us that when our son was undergoing the operation, the*  
348 *surgeons came out to explain what was happening. You are waiting there for many hours, and*  
349 *the fact that they came out to provide us with updates... It seemed to us that we always received*  
350 *information; they always asked you how you were doing and so on....”*

351 However, one parent reported a subjective experience in which, on some occasions, medical  
352 attention seemed excessive.

353 *“There are times when you get overwhelmed by all the medical attention. When you*  
354 *think about it rationally, you realise it is good that they are so thorough in attending to him*  
355 *and monitoring his condition. They want to ensure that everything is under control, and that*  
356 *they are doing well. It's just that we spend all day at the hospital, and at first glance, it can feel*  
357 *excessive.”*

358 One woman expressed dissatisfaction with the medical attention she received after donating a  
359 kidney to her son.

360 *“In my particular case, I was the donor, and naturally, all the attention was focused on*  
361 *the child, not the parent. However, I had also undergone surgery... In some way, I felt*  
362 *neglected, receiving minimal attention as an adult. This lack of care was concerning, setting*  
363 *aside a more emotional aspect, I could have experienced a medical complication.”*

364

365 Psychological and Emotional Factors

366 **Experiences, attitudes, beliefs, and expectations.** Parents shared their experiences  
367 and thoughts when undergoing their children’s transplantation process.

368 *“There were good days and bad days, but I’ve been very nervous and upset. I did not*  
369 *know what was going to happen, and everything could change in five minutes (...). The worst*  
370 *time for me was the month after the transplant when my daughter was admitted to the ICU. I*  
371 *only noticed the shortcomings of nurses, assistants, and doctors. I just wanted everyone to be*  
372 *with my daughter. I did not want to accept that it was my daughter's body that was sick; instead,*  
373 *I tended to blame others. Now that I am out of that rollercoaster, I look back and can*  
374 *understand it was very difficult, very complicated, and can see that everyone did their best. I*  
375 *am very grateful now and I have come to realise it was my nerves, the tension, the fear....”*

376 *“I felt a lot of fear, I wanted someone to tell me exactly what a heart transplant was*  
377 *like, what could happen... As time went on and I met more families, I came to understand that*  
378 *the anxiety I had about knowing what would happen couldn't be eased by another parent. I*  
379 *realised that my daughter's transplant would be unique to her. They might have performed fifty*  
380 *transplants before, but I understood that when they transplanted her, she would face her own*  
381 *set of complications, just as other children would face theirs.”*

382

383 **Wishes and desires.** We asked parents if there was anything they wished they could  
384 have had or felt they missed during their child's transplant process. One parent expressed that  
385 they missed the opportunity to convey gratitude to their son's donor.

386 *“There is one part that has always stayed with me, like a thorn in my side. I think it may*  
387 *be dictated by protocols that it cannot be done, but I always feel a debt of gratitude to the*  
388 *donors. It's like you receive the donation, and have not been able to thank them for anything.*  
389 *It is something that makes me feel like I have a debt I cannot repay. I imagine that it probably*

390 *cannot be done, and so on. But emotionally, if there is one thing I still need to do, it is to thank*  
391 *the donor."*

392

393 **Mental health care.** Parents discussed which stages of the transplant process they  
394 believed psychological support was most useful or necessary for their children. Several parents  
395 noted that their children began expressing sudden concerns about death in the period leading  
396 up to transplantation.

397 *"When the idea of the transplant was introduced, she did need psychological treatment.*  
398 *The treatment was not very, very demanding, but we did notice that from then on, she needed*  
399 *it, as she had changed a little bit. She started to be quieter, she started to think more... Anyway,*  
400 *she started asking us things about death... Now, we still go to the psychologist, but she is doing*  
401 *very well."*

402 *"In the months before the transplant, I noticed my son was very worried about death*  
403 *and related issues. I do not know if it's a normal concern or not at that age, but I think*  
404 *psychological care beforehand could have helped."*

405 Another fundamental aspect discussed was the necessity of providing psychological  
406 support not only for the child undergoing the transplant but also for other family members,  
407 such as siblings, who also experience distress during this period and may feel overlooked.

408 *"My eldest daughter had a very bad time and kept quiet about it. I think siblings are*  
409 *also victims in a way, and we only realise this later when everything calms down. When the*  
410 *calm comes after the tsunami, then you start to notice the other little people around you,*  
411 *reminding you that they exist and that the situation has also affected them (...). Psychological*  
412 *care is provided to the parents, but in my case, the siblings are somewhat left in no man's land*  
413 *(...). They are left alone at home with their grandparents or other family members and are*  
414 *often overlooked as the days go by."*

415 Social Factors

416 **Distance to the hospital.** Parents expressed the burden of not being able to receive  
417 medical attention in their own city, which forced them to commute to the city where the hospital  
418 is located. This situation disrupted their normal lives and resulted in significant economic loss.

419 *“Since we are from far away [a Spanish region far from the city where the hospital is*  
420 *located], we had to move and stay in Madrid for the whole time we were in the hospital and*  
421 *for the post-transplant period, as you have to go up to four times a week or several times a day*  
422 *to the hospital. These trips to Madrid have a cost and they do not allow you to make up with*  
423 *overtime at work.”*

424 *“If you live near [the hospital] that's fine, you have it easier, but those who do not live*  
425 *near, have to spend a lot of money on travel, for example, on lodging... and that, in the end, of*  
426 *course, is a stress, because you say gee... Can I do it? Can I afford it? I think that's a big*  
427 *problem.”*

428 Finally, some expressed how difficult it was to be far from their loved ones and unable to leave  
429 the city while their daughter was on the waitlist for heart transplants.

430 *“We were on the waitlist for three years. We have lived in Madrid for nine years since*  
431 *my daughter was born, but our family is in Granada [a region of Spain]. It was a tough three*  
432 *years because we could not leave Madrid.”*

433

434 **Need of creating a peer/family support network.** Parents agreed that it would have  
435 been beneficial for them and their children if the hospital had offered a peer/family support  
436 network, allowing them to meet other children and families in similar situations.

437 *“It would be good for the children, especially in a medical specialty such as lung*  
438 *transplantation, which is not very common as there are few cases and few children who have*  
439 *gone through this process and are alive; to be able to do some kind of activity for them to*

440 *interact more, get to know each other, share their experiences. Because in my son's case, he is*  
441 *now entering adolescence and just two weeks ago, he met another boy who had also received*  
442 *a lung transplant, and for him, it was something cool – he has gone through the same thing as*  
443 *me – he said. They need to share that information, they need to hear the opinion of someone*  
444 *else who went through the same process.”*

445 *“Those three years [waiting for her daughter's heart transplant] I would have liked to*  
446 *have met more parents in the same situation”.*

447

448 **Caregiver leave at the workplace.** One parent, although grateful for the flexibility  
449 offered at work, wished they had known what the law states about time off in such situations.

450 *“At work, they told me to take as many days off as necessary, but I thought maybe in*  
451 *other places there are more limited days of time off, or there is an established protocol...*  
452 *Because especially after the transplant you have to be at the hospital for a long time and I think*  
453 *it is more than the legal time allowed”.*

454

455 **Outpatient care.** Some parents expressed complaints about waiting times.

456 *“I don't know what the hospital protocol is like or anything, but you arrive with a child*  
457 *who has been very ill and still is, and you have to wait three hours for an appointment... I do*  
458 *not understand why they do not give them a card or something to help respect the appointment*  
459 *times. If they had to wait forty minutes, okay, but what is not acceptable is three or four hours.*  
460 *And if you have another appointment that day, it means that for two consultations, you could*  
461 *be losing up to five or six hours.”*

462 Concerns were also voiced about remaining in a crowded waiting room with an ill child who  
463 was exposed to many other children for extended periods.

464           *“When you’re in a waiting room with forty other people and you have to stay there for*  
465 *three or four hours, you are putting your daughter at risk of catching anything. They are*  
466 *children who have been transplanted and well, my daughter was also weak before she was*  
467 *transplanted, so, I think that should be improved.”*

468

469           **Balancing/conciliating hospital visits with work and family responsibilities.** This  
470 aspect was a shared concern among the participants of the group.

471           *“There is significant stress for us as parents trying to be in two places at once – work*  
472 *and the hospital. The challenge is even harder if you have more children. We need to make a*  
473 *living but it’s hard to balance the fact that you have to dedicate yourself to your son who is in*  
474 *post-operative care, at the same time that you are leaving work and family behind.”*

475           *“In my case, we spent six months in hospital, from the time she was transplanted until*  
476 *she came home. A long time passed and my other children felt in some way abandoned. – Where*  
477 *are my parents? – they must have thought. And of course, you get home, and you need to sleep*  
478 *because you are knackered, and all you really want to do is go back to the hospital because my*  
479 *only obsession was to be in the hospital. My eldest daughter had a bad time because, of course,*  
480 *I could not look after her, my husband could not look after her...We spent most of our time at*  
481 *the hospital.”*

482

483           **Bureaucratic challenges.** There was widespread discontent with how time-consuming  
484 and inefficient bureaucracy can be, especially when you have a child who is ill and needs full  
485 attention.

486           *“Paperwork is very slow and time-consuming in general, and even more so for those of*  
487 *us who are parents of children who are ill and need all our time, they need us to be with them*

488 100%. We do not have time to be doing all these procedures and going from one place to the  
489 other because the children need 100% of the parents' care.”

490 “You have to navigate through a lot of bureaucracy. For instance, with my daughter,  
491 they approved her dependency status because before her operation, she had only half a heart  
492 and needed oxygen. However, it took two and a half years to get that approval. Another  
493 frustrating issue is how they assess her disability level; it can change if her condition improves  
494 or after surgery, and then you are back to fighting bureaucracy again, all while caring for a  
495 sick child at home. It is unpredictable—today they grant you assistance, but tomorrow they  
496 might revoke it. For instance, after a successful transplant, she might need a tracheotomy, so  
497 the situation keeps changing, and you cannot constantly update the administration about the  
498 evolving circumstances.”

499

500 **Laws, rights aid, and the information received regarding them.** Some parents were  
501 disappointed to discover very late, or not at all, certain laws that could have provided crucial  
502 support during their child's transplant.

503 “Nobody informed us that there was a law that covered parents with children with  
504 serious illnesses and allowed you to reduce your working hours as from 50% up until 100%  
505 (...). I found out very late that I could have dedicated myself exclusively to the care of my son  
506 and still receive my full salary.”

507 They also missed having a reference figure to whom they could direct their questions about  
508 laws and available social aid.

509 “I missed having a specific figure to inform us about all the regulations, laws, aid, and  
510 procedures necessary when you have a child with special needs and requires special attention.  
511 There are likely many laws or regulations, whether at the State or community level, that I am  
512 unaware of and may only learn about in the future. I miss having a unified figure to guide us.



513 *Today, I feel we are excluded from all the help offered by the Country and the community*  
514 *because we simply do not know about it. There is no one to inform us.”*

515 One woman described feeling misinformed and struggling to understand the processes because  
516 she was an immigrant and unfamiliar with many laws and regulations.

517 *“I don't know the policies, I don't know the Country's system... I do not know how to get*  
518 *an appointment to be informed... It has been very hard for me. I have been doing this for three*  
519 *years now, and I do not see that there is an organisation offering help to a parent who does*  
520 *not know or is not from this country. I do not have the degree of Dependency...I have knocked*  
521 *on the doors of the social workers and I have not managed anything.”*

522 A woman expressed disappointment that psychological support provided by national insurance  
523 is not available in her homeland for children who have undergone transplants.

524 *“Here in Gran Canaria, psychological support for a transplanted child isn't considered*  
525 *necessary, so we had to pay for private consultations. Unlike getting a prescription for*  
526 *medication, psychological treatment takes time, and sometimes the financial burden is too*  
527 *much to bear. We were told by the national insurance that unless there is something like*  
528 *Attention-Deficit/Hyperactivity Disorder (ADHD), or a condition of the autistic spectrum or a*  
529 *dysfunctional family, that my son was not eligible for psychological therapy.”*

530

531 **Parents' advocacy for transplanted children to be recognised as a collective.**

532 *“My son faces both nephrological and visual challenges. The main issue is that*  
533 *transplanted children are not recognised as a distinct group. For instance, my son receives*  
534 *comprehensive support for his visual impairment from the Department of Education, including*  
535 *a social worker, teachers, and adapted materials, because individuals with visual impairments*  
536 *are recognised as a group. In contrast, transplanted children do not receive similar support—*  
537 *there are no counsellors or social workers available to us. For my son's visual impairment, we*

538 *have regular visits, phone calls, appointments, and guidance on aids. However, for his*  
539 *transplant-related needs, there is minimal support and recognition. It is crucial for*  
540 *transplanted children to be acknowledged as a distinct collective group, similar to how other*  
541 *groups such as those with visual impairments or mobility issues are recognised and*  
542 *supported.”*

543

## 544 **Discussion**

545 To the best of our knowledge, this is the first study to qualitatively examine the  
546 perceived unmet needs throughout the paediatric organ transplantation process, comparing the  
547 subjective perspectives of both adolescent patients and parents regarding several  
548 biopsychosocial domains and jointly covering various types of solid organ transplants. This  
549 work revealed significant insights into the experiences and perceptions of adolescents and  
550 parents concerning medical care, social dynamics, and psychological challenges associated  
551 with undergoing a solid organ transplant. We now discuss the findings identified as most  
552 relevant from both focus groups and compare these results with the existing body of literature.  
553 Furthermore, we conducted a comparative analysis of topics that emerged across the two focus  
554 groups.

555 On one hand, a significant finding was the disparity between the focus of parents and  
556 teenagers on academic concerns. In particular, parents tended not to mention academics,  
557 whereas adolescents frequently expressed overwhelming anxiety regarding their academic  
558 performance, which was exacerbated by a perceived lack of educational support and  
559 adaptations. Additionally, existing literature suggests that adolescent transplant recipients may  
560 exhibit cognitive and neuropsychological impairments [12,13], which may contribute to the  
561 aforementioned perceived problems. This underscores the need for more robust academic  
562 support systems tailored to adolescents’ unique circumstances [14].

563 On the other hand, key issues that emerged for both informants were inconveniences  
564 regarding the distance to the hospital, long waiting times for outpatient hospital visits, the need  
565 for peer support, satisfaction with the humanised care provided by healthcare workers, and the  
566 relevance of mental health support during the transplant process.

567 In particular, the experience of Adolescent 5 underscores a common challenge faced by  
568 patients who must travel to another city for transplant procedures because they reside in other  
569 regions. In this sense, La Paz University Hospital is a national reference hospital in Spain and  
570 is the only hospital to date that performs all paediatric transplants. The logistical complexities  
571 of long-distance travel, often via ambulances or planes, add a layer of stress to the already  
572 taxing situation. Moreover, distance to the hospital imposes an economic burden on families,  
573 who must cover the costs of lodging and related expenses. Being far from loved ones during  
574 difficult times can also be emotionally distressing. Peretz et al. [15] examined the psychological  
575 and financial challenges associated with long-distance travel for liver transplantation. While  
576 patients generally remain confident in their healthcare providers and do not feel that their care  
577 is compromised by distance, many, particularly women, expressed dissatisfaction with the  
578 limited opportunities to support visits. Additionally, the economic burden of being far from  
579 home likely contributed to 70% of patients preferring to undergo the procedure locally. These  
580 factors suggest a need for more localised transplant services or improved support for travel and  
581 lodging logistics to reduce the burden on patients and their families.

582 In addition, extended outpatient waiting times were generally poorly tolerated, and  
583 prolonged hospital stays were particularly challenging for the adolescent group. This highlights  
584 an area that requires urgent improvement to enhance patient and caregiver satisfaction, as  
585 previously noted in the literature on paediatric outpatient care [16].

586 Furthermore, both parents and adolescents identified social issues as their predominant  
587 concern over biomedical and psychological issues. This finding is consistent with the current

588 research, which shows that patients and families face enduring psychosocial risks long after  
589 the initial post-transplant phase [17]. Consequently, it is essential to make social support a  
590 central component of interventions to address the well-being of patients and their families  
591 effectively.

592         Among the topics that emerged at a social level, participants conveyed that they would  
593 have greatly valued the opportunity to engage in peer and family support groups. In particular,  
594 the adolescent group in this study expressed being particularly affected by periods of limited  
595 social interaction due to hospital admissions and necessary isolation protocols. Social isolation  
596 can be distressing, emphasising the importance of creating robust communication channels and  
597 support systems to mitigate the impact of isolation on patients' mental health [18]. This is  
598 consistent with the work of Anthony et al. [19], who emphasised the significant benefits that  
599 adolescents gain from peer support programs, reporting the satisfaction perceived among  
600 participants in an online mentorship program designed for paediatric transplant patients. Such  
601 peer groups provide critical emotional support and a sense of community, which can  
602 significantly improve the coping mechanisms of both patients and their families.

603         Furthermore, one of the notable social-level suggestions highlighted by participants in  
604 the parent group was the potential benefit of having a unified reference figure from Social  
605 Work to assist with bureaucratic procedures systematically rather than reactively. This would  
606 alleviate the administrative burden on families, allowing them to focus on emotional and  
607 psychological aspects of care. There was a strong desire for a dedicated reference person who  
608 could provide expert guidance on complex laws and regulations related to medical care,  
609 economic aid, and work-leave entitlements. For instance, in Spain, Compensation for Leave to  
610 Care for Children with Cancer or Serious Illnesses (CUME, acronym in Spanish) [20] allows  
611 working parents to take leave to care for children undergoing serious medical treatment, with  
612 financial support provided during their absence. However, one parent noted that they only

613 learned about this social aid during the focus group discussion of this project and wished that  
614 they had been informed earlier.

615         The difficulty of balancing family responsibilities with work commitments has also  
616 been highlighted as a significant challenge. This difficulty aligns with the existing literature,  
617 which categorises the challenges faced by parents of children with chronic illnesses into three  
618 domains: work, family, and personal. Workplace challenges commonly include securing  
619 flexible work arrangements, managing absenteeism, and encountering unsupportive employer  
620 attitudes. Family-related issues involve finding suitable childcare facilities, managing time  
621 constraints, supporting ill children, and fulfilling overall family duties. On a personal level,  
622 parents frequently experience stress, uncertainty about the future, and the feeling of “having to  
623 do it all” [21]. This calls for more flexible support systems to assist families in effectively  
624 managing their dual responsibilities.

625         Additionally, addressing the needs of siblings was another critical point. Existing  
626 literature indicates that siblings of children with chronic conditions face unique challenges that  
627 affect their health-related quality of life, including negative emotions, separation anxiety,  
628 increased responsibilities, and feelings of exclusion [22]. Feelings of abandonment among  
629 siblings must be mitigated by including them in the entire care process and offering  
630 psychological support, as necessary. This holistic approach ensures that the emotional needs of  
631 the family are met, thereby promoting a more cohesive support system.

632         It is possible that all of these perceived needs could be partially addressed by the  
633 suggestions made by one of the parents during the focus group. They proposed that children  
634 undergoing transplantation should be legally categorised as a distinct group regarding disability  
635 recognition. This recognition would streamline access to the necessary support services for  
636 these children and ensure that parents receive accurate and timely information.

637 Finally, humanised interaction by healthcare personnel was highly valued by both  
638 patients and parents, underscoring the importance of empathy and compassion in medical care  
639 [23]. Additionally, both groups agreed that mental health support was beneficial throughout  
640 the transplantation process. In particular, this study highlights the pressing need to address  
641 thoughts of death and the associated psychological impact among these patients. Consequently,  
642 it is imperative to improve mental health interventions to provide comprehensive support.  
643 Accordingly, the mental health profiles of diverse paediatric organ transplant recipients are  
644 being increasingly investigated to ensure the provision of holistic care for these clinical  
645 populations [2,11,24].

646

#### 647 ***Strengths and Limitations***

648 Regarding the limitations of this study, it included a modest sample size from a single  
649 hospital. Nevertheless, the participants were selected purposively to encompass a  
650 representative view of the diverse potential circumstances surrounding the paediatric transplant  
651 process in accordance with sociodemographic and clinical criteria (organ type, sex, and  
652 socioeconomic status). Furthermore, despite the potential for conformity processes among  
653 participants in the focus group methodology, members in both groups conducted for this study  
654 expressed divergent perspectives and nuanced opinions, demonstrating their willingness to  
655 articulate discrepancies with other participants.

656

#### 657 ***Conclusions***

658 In conclusion, despite these limitations, this study suggests several key areas for  
659 improvement in the care and support of adolescent transplant patients and their families.  
660 Enhancing academic support, reducing outpatient waiting times, the humanised interaction by  
661 healthcare personnel, providing mental health and comprehensive family support are critical

662 steps towards improving the overall care experience and represent key areas for future research.  
663 Additionally, the establishment of a unified Social Work figure to assist bureaucratic processes  
664 is also considered essential in addressing the multifaceted needs of these patients and their  
665 families. These findings will inform the design of future multifaceted prehabilitation  
666 interventions for the entire paediatric transplant process.

667

## 668 **Acknowledgments**

669 The authors acknowledge Dr Antonio Pérez-Martínez's contribution in funding acquisition for  
670 this project. Furthermore, the authors extend their appreciation to all healthcare professionals  
671 who referred patients to this study. Finally, the authors express their gratitude to the  
672 psychologist who assisted the research team in conducting group sessions and in-depth  
673 interviews.

674

675

676

677

678

679

680

681

682

683

## 684 **References**

- 685 1. Smith JM, Marks SD. Offering children the best organs to optimize transplantation  
686 outcomes. *Pediatr Transplant*. 2023;27 Suppl 1: e14384. doi:10.1111/ptr.14384
- 687 2. Penner EK, Walker H, Moon E, Slavec J, Hind T, Blydt-Hansen TD. The mental health  
688 profiles of pediatric organ transplant recipients. *Pediatr Transplant*. 2022;26: e14151.  
689 doi:10.1111/ptr.14151
- 690 3. Annunziato RA, Jerson B, Seidel J, Glenwick DS. The psychosocial challenges of solid  
691 organ transplant recipients during childhood. *Pediatr Transplant*. 2012;16: 803–811.  
692 doi:10.1111/j.1399-3046.2012.01749.x
- 693 4. Amatya K, Monnin K, Steinberg Christofferson E. Psychological functioning and  
694 psychosocial issues in pediatric kidney transplant recipients. *Pediatric Transplantation*.  
695 2021;25: e13842. doi:10.1111/ptr.13842
- 696 5. Comunidad de Madrid. El Hospital La Paz de la Comunidad de Madrid, el que más  
697 trasplantes pediátricos practicó de toda España en 2022 [La Paz Hospital of the  
698 Community of Madrid, the hospital that performed the most pediatric transplants in Spain  
699 in 2022]. 29 Mar 2023. Available: [https://www.comunidad.madrid/notas-](https://www.comunidad.madrid/notas-prensa/2023/03/29/hospital-paz-comunidad-madrid-trasplantes-pediatricos-practico-toda-espana-2022)  
700 [prensa/2023/03/29/hospital-paz-comunidad-madrid-trasplantes-pediatricos-practico-](https://www.comunidad.madrid/notas-prensa/2023/03/29/hospital-paz-comunidad-madrid-trasplantes-pediatricos-practico-toda-espana-2022)  
701 [toda-espana-2022](https://www.comunidad.madrid/notas-prensa/2023/03/29/hospital-paz-comunidad-madrid-trasplantes-pediatricos-practico-toda-espana-2022)
- 702 6. Miserachs M, Nicholas DB, Otley AR, Ng VL. Health-Related Quality of Life after  
703 Pediatric Liver Transplantation: A Qualitative Analysis of the Perspectives of Health Care  
704 Providers. *Can J Gastroenterol Hepatol*. 2017;2017: 5274923. doi:10.1155/2017/5274923
- 705 7. van der Spek N, Vos J, van Uden-Kraan CF, Breitbart W, Tollenaar RAEM, Cuijpers P,  
706 et al. Meaning making in cancer survivors: a focus group study. *PLoS One*. 2013;8:  
707 e76089. doi:10.1371/journal.pone.0076089



- 708 8. Tong A, Sainsbury P, Craig J. Consolidated criteria for reporting qualitative research  
709 (COREQ): a 32-item checklist for interviews and focus groups. *Int J Qual Health Care*.  
710 2007;19: 349–357. doi:10.1093/intqhc/mzm042
- 711 9. Thompson D, Deatrick JA, Knafl KA, Swallow VM, Wu YP. A Pragmatic Guide to  
712 Qualitative Analysis for Pediatric Researchers. *J Pediatr Psychol*. 2022;47: 1019–1030.  
713 doi:10.1093/jpepsy/jsac040
- 714 10. Aspers P, Corte U. What is Qualitative in Qualitative Research. *Qualitative Sociology*.  
715 2019;42: 139–160. doi:10.1007/s11133-019-9413-7
- 716 11. Garrido-Bolton J, Alcamí-Pertejo M, de la Vega R, Hernández-Oliveros F, Pérez-  
717 Martínez A, Bravo-Ortiz MF, et al. Neuropsychological and biopsychosocial evolution,  
718 therapeutic adherence and unmet care needs during paediatric transplantation: study  
719 protocol of a mixed-methods design (observational cohort study and focus groups) – the  
720 TransplantKIDS mental health project. *Frontiers in Psychology*. 2024;15. Available:  
721 <https://www.frontiersin.org/journals/psychology/articles/10.3389/fpsyg.2024.1308418>
- 722 12. Fredericks EM, Zelikovsky N, Aujoulat I, Hames A, Wray J. Post-transplant adjustment--  
723 the later years. *Pediatr Transplant*. 2014;18: 675–688. doi:10.1111/petr.12366
- 724 13. Reed-Knight B, Lee JL, Cousins LA, Mee LL. Intellectual and academic performance in  
725 children undergoing solid organ pretransplant evaluation. *Pediatr Transplant*. 2015;19:  
726 229–234. doi:10.1111/petr.12389
- 727 14. Ünay M, Önder A, Gizli Çoban Ö, Atalay A, Sürer Adanir A, Artan R, et al.  
728 Psychopathology, quality of life, and related factors in pediatric liver transplantation  
729 candidates and recipients. *Pediatric Transplantation*. 2020;24: e13633.  
730 doi:10.1111/petr.13633

- 731 15. Peretz D, Grubert Van Iderstine M, Bernstein M, Minuk GY. The Psychological and  
732 Financial Impact of Long-distance Travel for Liver Transplantation. *Transplant Direct*.  
733 2020;6: e558. doi:10.1097/TXD.0000000000001005
- 734 16. Sengupta M, Chakrabarti S, Mukhopadhyay I. Waiting time: the expectations and  
735 preferences of patients in a paediatric OPD. *Journal of Health Management*. 2019;21:  
736 427–442.
- 737 17. Cousino MK, Schumacher KR, Rea KE, Eder S, Zamberlan M, Jordan J, et al.  
738 Psychosocial functioning in pediatric heart transplant recipients and their families. *Pediatr*  
739 *Transplant*. 2018;22. doi:10.1111/petr.13110
- 740 18. James C, Corman H, Noonan K, Reichman NE, Jimenez ME. Chronic health conditions  
741 and adolescents' social connectedness. *Am J Orthopsychiatry*. 2024;94: 235–245.  
742 doi:10.1037/ort0000712
- 743 19. Anthony SJ, Young K, Ghent E, Gold A, Martin K, Solomon M, et al. Exploring the  
744 potential for online peer support mentorship: Perspectives of pediatric solid organ  
745 transplant patients. *Pediatr Transplant*. 2021;25: e13900. doi:10.1111/petr.13900
- 746 20. Spanish Ministry of Labor and Immigration. Real Decreto 1148/2011 para la aplicación  
747 y desarrollo, en el sistema de la Seguridad Social, de la prestación económica por cuidado  
748 de menores afectados por cáncer u otra enfermedad grave [Royal Decree 1148/2011 for  
749 the application and development, in the Social Security system, of the economic benefit  
750 for the care of minors affected by cancer or other serious illnesses]. Jul 29, 2011.  
751 Available: <https://www.boe.es/eli/es/rd/2011/07/29/1148/con>
- 752 21. Kish AM, Newcombe PA, Haslam DM. Working and caring for a child with chronic  
753 illness: A review of current literature. *Child Care Health Dev*. 2018;44: 343–354.  
754 doi:10.1111/cch.12546

- 755 22. White TE, Hendershot KA, Dixon MD, Pelletier W, Haight A, Stegenga K, et al. Family  
756 Strategies to Support Siblings of Pediatric Hematopoietic Stem Cell Transplant Patients.  
757 Pediatrics. 2017;139: e20161057. doi:10.1542/peds.2016-1057
- 758 23. Decety J. Empathy in Medicine: What It Is, and How Much We Really Need It. Am J  
759 Med. 2020;133: 561–566. doi:10.1016/j.amjmed.2019.12.012
- 760 24. Thomson K, McKenna K, Bedard-Thomas K, Oliva M, Ibeziako P. Behavioral health  
761 care in solid organ transplantation in a pediatric setting. Pediatr Transplant. 2018;22:  
762 e13217. doi:10.1111/petr.13217
- 763
